# Supplementary material for: Matrix Topographical Cue-Mediated Myogenic Differentiation of Human Embryonic Stem Cell Derivatives
Source: MDPI journal article supplement (doi:10.3390/polym9110580), 2017-11-05
Supplement: s1 [file s1]

| Gene | Primer Sequence (5' to 3')                                             |
|------|------------------------------------------------------------------------|
| MYOD | F-AGC ACT ACA GCG GCG ACT C<br>R-TAG TAG GCG CCT TCG TAG CA            |
| DES  | F-GAA GCT GCT GGA GGG AGA G<br>R-ATG GAC CTC AGA ACC CCT TT            |
| MYOG | F-CAG CTC CCT CAA CCA GGA G<br>R-GCT GTG AGA GCT GCA TTC G             |
| MYH1 | F-TCT TGG ACA TTG CTG GCT TT<br>R-TCC ACT CAA TGC CTT CCT TC           |
| 18s  | F-CCC TGT AAT TGG AAT GAG TCC ACT T<br>R-ACG CTA TTG GAG CTG GAA TTA C |
