# Supplementary figures and images for: Matrix Topographical Cue-Mediated Myogenic Differentiation of Human Embryonic Stem Cell Derivatives
Source: MDPI journal article supplement (doi:10.3390/polym9110580), 2017-11-05

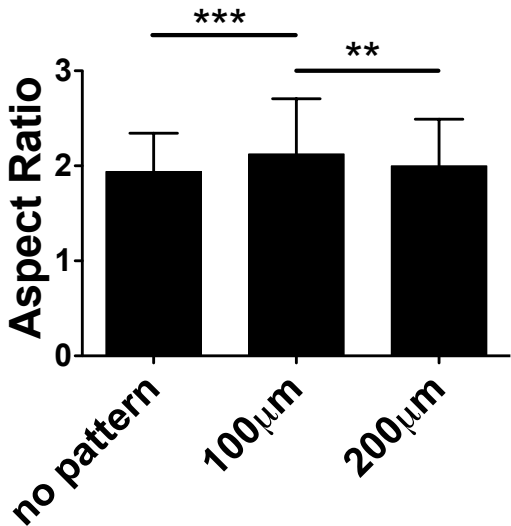

Supplement: s1 [file s1]
